# Supplementary material for: The rotor as a sensor – Observing shear and veer from the operational data of a large wind turbine
Source: Copernicus journal article supplement (doi:10.5194/wes-2023-134), 2023-11-07
Supplement: Supplementary file [file wes-2023-134-RC1-supplement.pdf]

# Review - The rotor as a sensor - Observing shear and veer from the operational data of a large wind turbine

December 4, 2023

## Summary

This is a good paper on estimation of shear and veer using NN. It is tested using a full scale turbine. This is a contribution on its own. Also the performance of the estimators are convincing. It would be interesting to see the NN estimators compared with something simpler. The paper is well written and organized. Consequently, the paper can be published after minor corrections.

## Specific comments

1. P5 "Flapwise and edgewise measurements from the strain gauges placed at blade root"
  - (a) Is the sensors used standard for the wind turbine?
  - (b) Or is it part of the measurement campaign sensors?
  - (c) It would be best if it were the standard ones. This is also what is stated by the paper on p 9 | 160-170.
2. P13 Appendix A There are some unclear parts here
  - (a) If  $u_n$  is tangential to the rotor disc and  $V_0$  is parallel to the rotor disc, how can  $V_0$  contribute to  $u_n$ ?
  - (b) " $\beta$  is the blade flap angle" but what is that?
  - (c) What is  $u_p$ ? Is it  $u_n$
